# Supplementary material for: Differential Expression of Conserved Germ Line Markers and Delayed Segregation of Male and Female Primordial Germ Cells in a Hermaphrodite, the Leech Helobdella
Source: PubMed Central journal article supplement — Mol Biol Evol. 2013 Nov 9;31(2):341–54. doi: 10.1093/molbev/mst201 (PMC3907050; doi:10.1093/molbev/mst201), 2013-11-09

**SUPPLEMENTARY MATERIALS**

**TABLE S1.** piwi, vasa, ago and PL10 genes in *Helobdella robusta* genome

| <b>Gene name</b> | <b>Gene model</b>               | <b>Protein ID<br/>(filtered model<br/>if different)</b> | <b>Scaffold location</b>        |
|------------------|---------------------------------|---------------------------------------------------------|---------------------------------|
| <i>Hro-piwi1</i> | estExt_Genewise1Plus.C_160437   | 110366 (75625)                                          | scaffold_16:3131614-3144934 (+) |
| <i>Hro-piwi2</i> | estExt_fgenesh4_pg.C_30678      | 188675 (65566)                                          | scaffold_3:6235842-6244114(+)   |
| <i>Hro-vasa1</i> | estExt_Genewise1Plus.C_80601    | 108526                                                  | scaffold_8:5337420-5340951(-)   |
| <i>Hro-vasa2</i> | gw2.3.49.1                      | 65423                                                   | scaffold_3:4512521-4516451(+)   |
| <i>Hro-ago1</i>  | e_gw1.3.302.1                   | 65165                                                   | scaffold_3:2673663-2688060(-)   |
| <i>Hro-ago2</i>  | fgenesh4_pg.C_scaffold_79000057 | 182062                                                  | scaffold_79:528910-540709(-)    |
| <i>Hro-PL10a</i> | estExt_Genewise1Plus.C_10717    | 105366                                                  | scaffold_1:5855406-5863348(+)   |
| <i>Hro-PL10b</i> | estExt_fgenesh4_pg.C_1020014    | 194828                                                  | scaffold_102:152850-159086(-)   |
| <i>Hro-PL10c</i> | estExt_Genewise1Plus.C_20327    | 105974                                                  | scaffold_2:2744284-2748920(-)   |
| <i>Hro-PL10d</i> | fgenesh4_pm.C_scaffold_41000002 | 157479                                                  | scaffold_41:247727-249189(+)    |

**Figure S1. Co-expression of *Hau-piwi1* and *Hau-vasal1* in developing ovaries.**

(A) Two color fluorescent in situ showing *Hau-piwi1* (green, left) and *Hau-vasal1* (red, center) and merged views (right). Upper panels show ventral views of late stage 11 embryos, with paired spots of *Hau-piwi1* and *Hau-vasal1* expression (arrows), persisting from stage 9 in segment M6. (B) Lower panels show traverse sections (ventral down) through segment M6, counterstained with DAPI, revealing the dorsally projecting arms (arrowheads) of the developing ovaries and segmental ganglion (g). Scale bar, 200  $\mu\text{m}$  in A; 100  $\mu\text{m}$  in B.

**Figure S2. The female germline originates from the ipsilateral M lineage.**

Confocal micrographs of an embryo processed at early stage 11 by two color fluorescent in situ hybridization for *Hau-piwi1* (green, left) and *Hau-vasal1* (red, center). This embryo had also had its left mesodermal teloblast ( $M_L$ ) injected with FarRed dextran amine (blue, right) at birth (stage 5); the righthand panels also show the merged views of the *Hau-piwi1* and *Hau-vasal1* signals in segment M6. (A) Upper panels show a ventral view including parts of about ten segments. (B) Lower panels show combined brightfield and fluorescence micrographs of a transverse section (ventral down) through segment M6. Labels indicate yolk (y) and ganglion (g). Scale bars, 100  $\mu\text{m}$ .

Figure S1

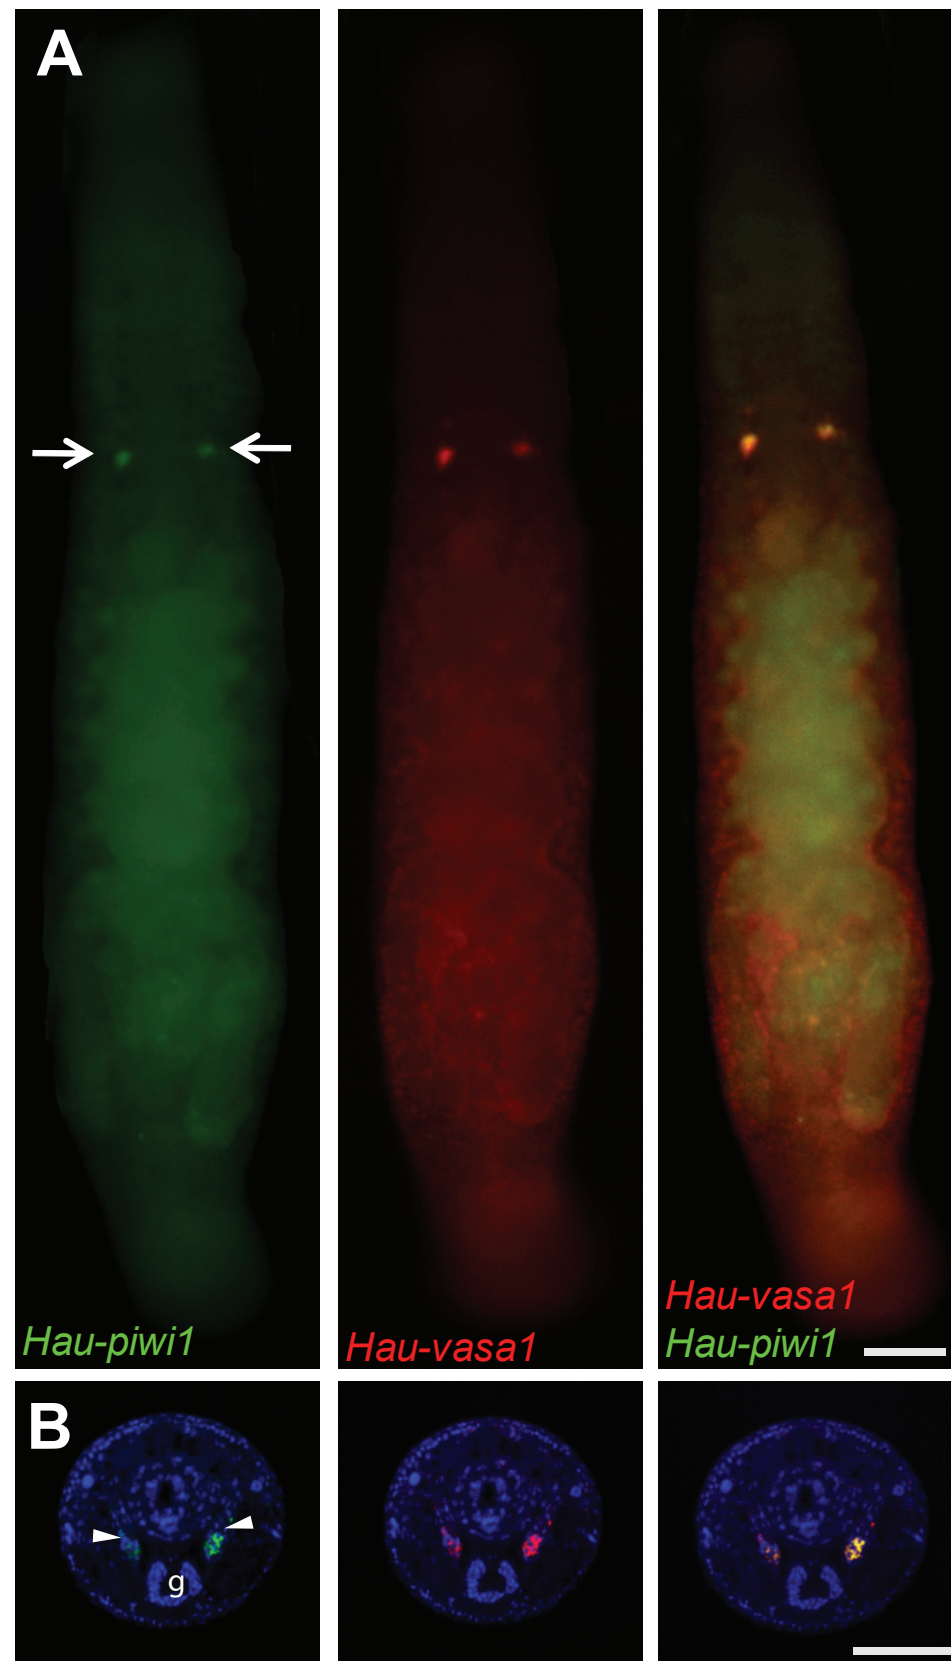

Figure S2

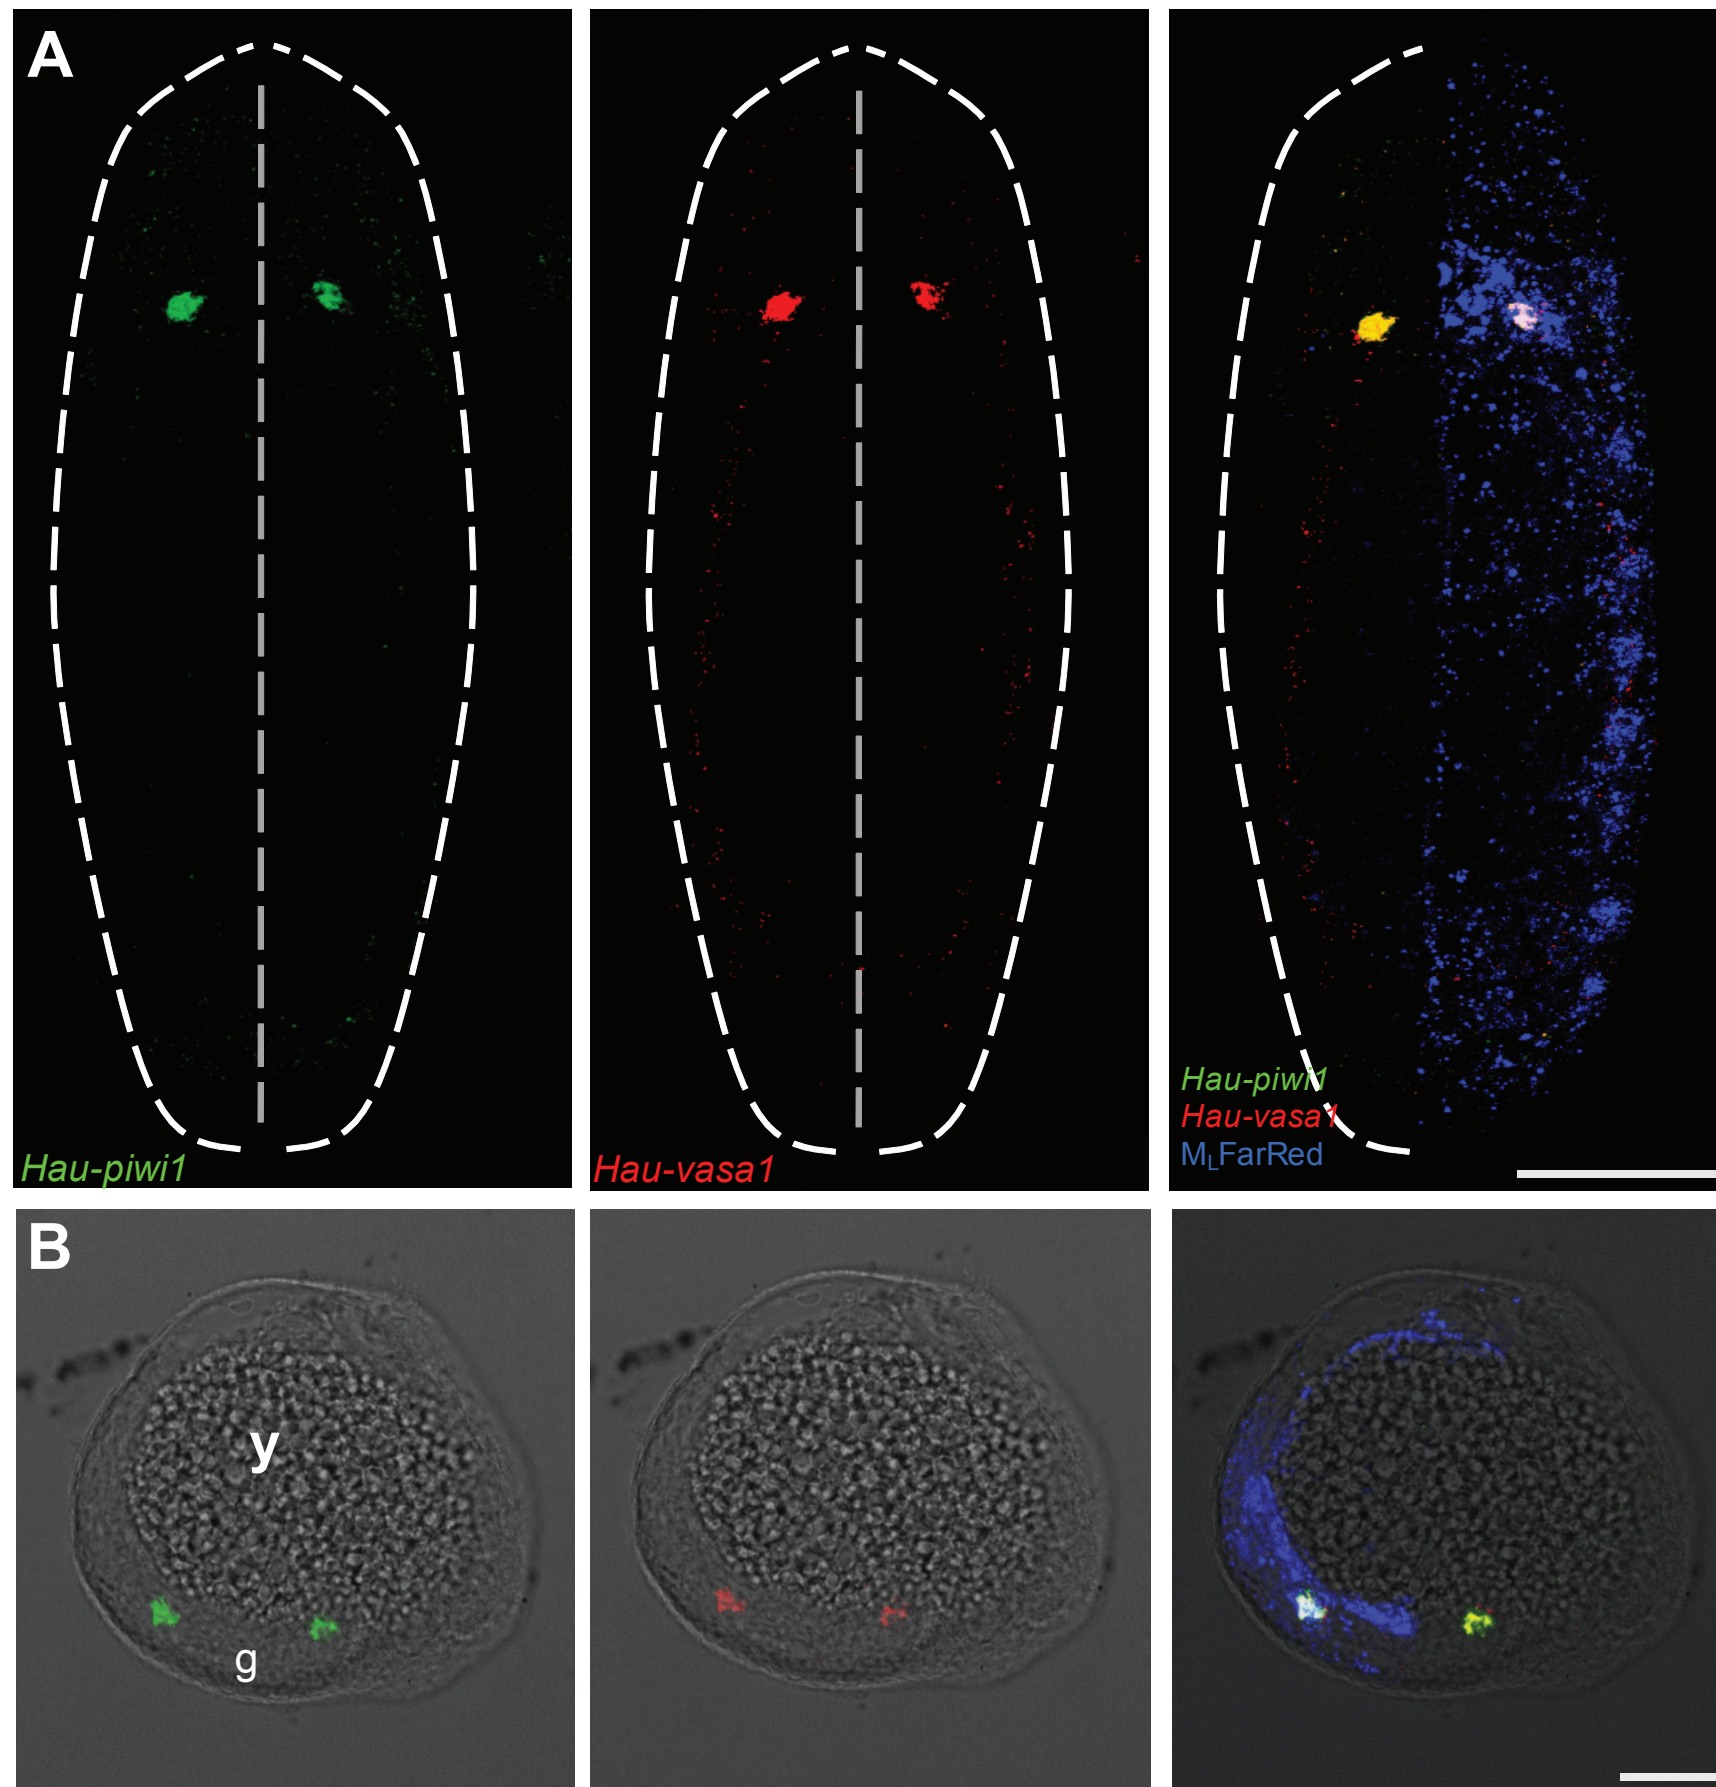

Supplement: supp_mst201_ChoValles2_SUPPL.pdf [file supp_mst201_ChoValles2_SUPPL.pdf]
